# Supplementary material for: Different Impacts of Heat-Killed and Viable Lactiplantibacillus plantarum TWK10 on Exercise Performance, Fatigue, Body Composition, and Gut Microbiota in Humans
Source: MDPI journal article supplement (doi:10.3390/microorganisms10112181), 2022-11-03
Supplement: s1 [file s1]

Microorganisms Supplementary Materials for:

**Different impacts of heat-killed and viable  
*Lactiplantibacillus plantarum* TWK10 on exercise  
performance, fatigue, body composition, and gut  
microbiota in humans**

**Chia-Chia Lee<sup>1,†</sup>, Yi-Chu Liao<sup>1,†</sup>, Mon-Chien Lee<sup>2</sup>, Yi-Chen Cheng<sup>1</sup>,  
Shiou-Yun Chiou<sup>1</sup>, Jin-Seng Lin<sup>1</sup>, Chi-Chang Huang<sup>2,\*</sup>, Koichi  
Watanabe<sup>1,3,\*</sup>**

<sup>1</sup> Culture Collection & Research Institute, SYN BIO TECH INC.,  
Kaohsiung, Taiwan.

<sup>2</sup> Graduate Institute of Sports Science, National Taiwan Sport University,  
Taoyuan, Taiwan.

<sup>3</sup> Department of Animal Science and Technology, National Taiwan  
University, Taipei, Taiwan.

\* Correspondence:

Chi-Chang Huang (john5523@ntsu.edu.tw)

Koichi Watanabe (koichi\_wtnb@yahoo.co.jp)

† These authors contributed equally to this work and share first authorship

**A**

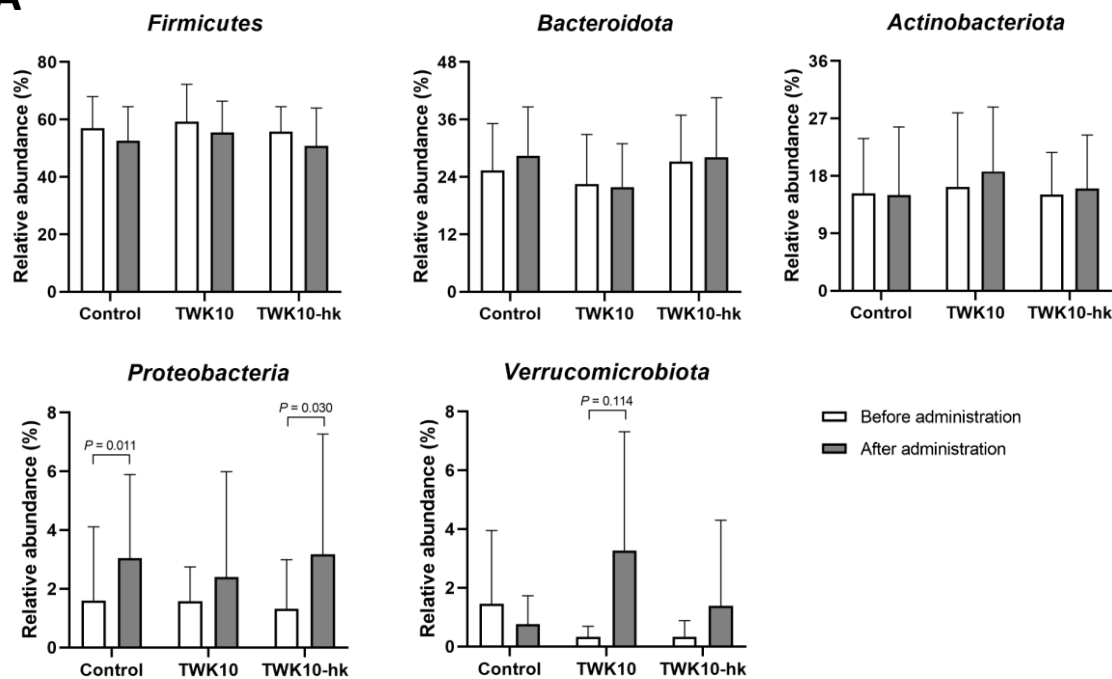

**B**

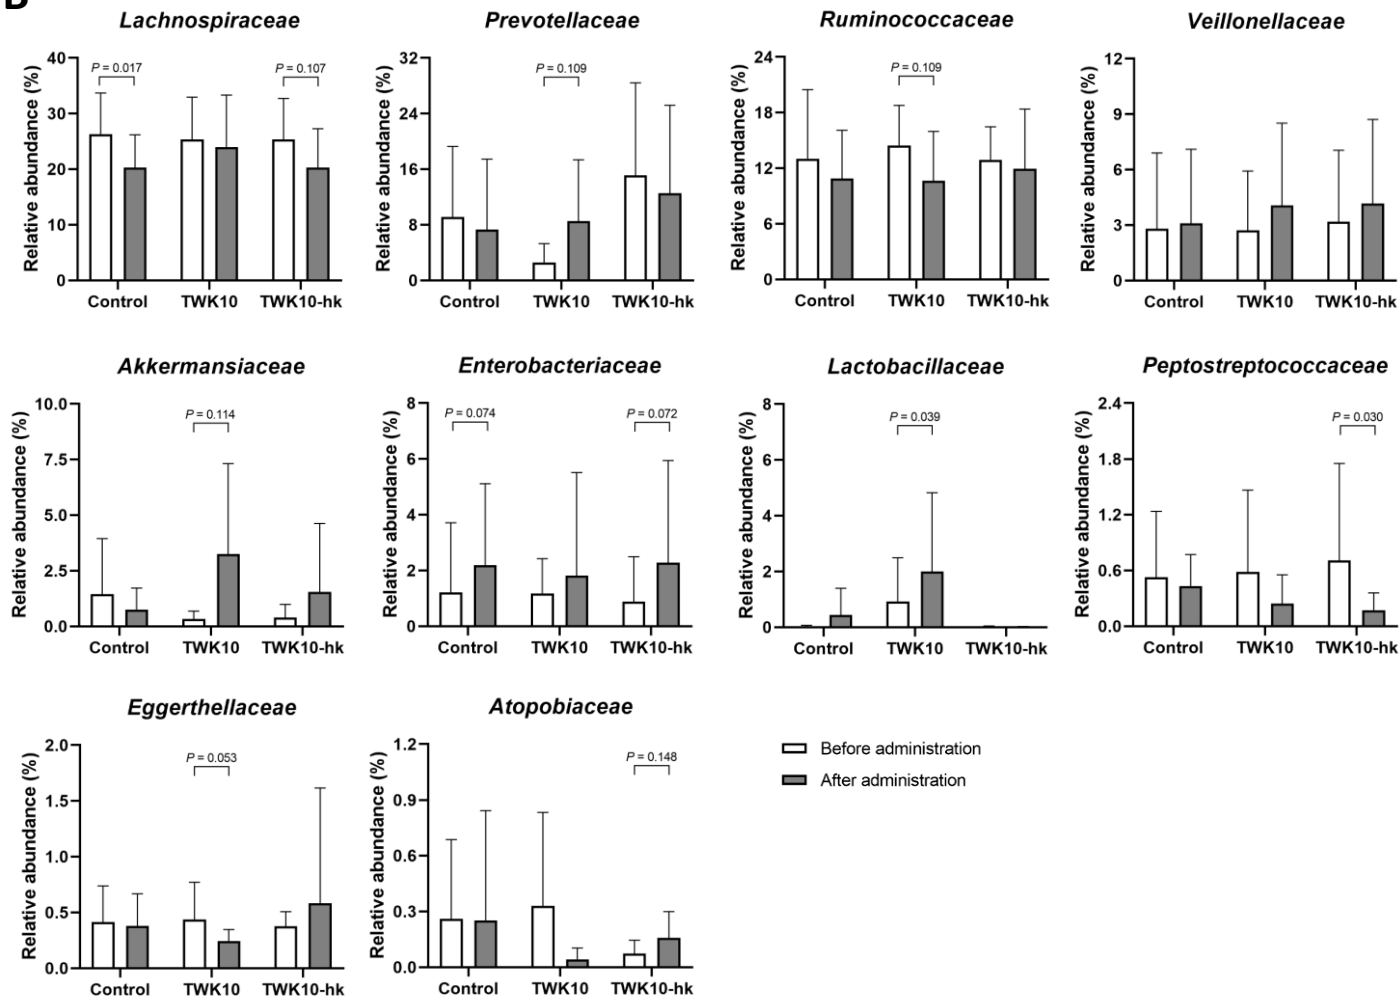

**Figure S1. Relative abundances of the major gut microbiota among groups.** Columns show the relative abundances of bacterial taxa at the (A) phylum and (B) family level in the Control, TWK10, and TWK10-hk groups compared with their baselines. Data shown as mean  $\pm$  SD. Statistical differences between before and after administration were analyzed by Mann-Whitney  $U$  test.

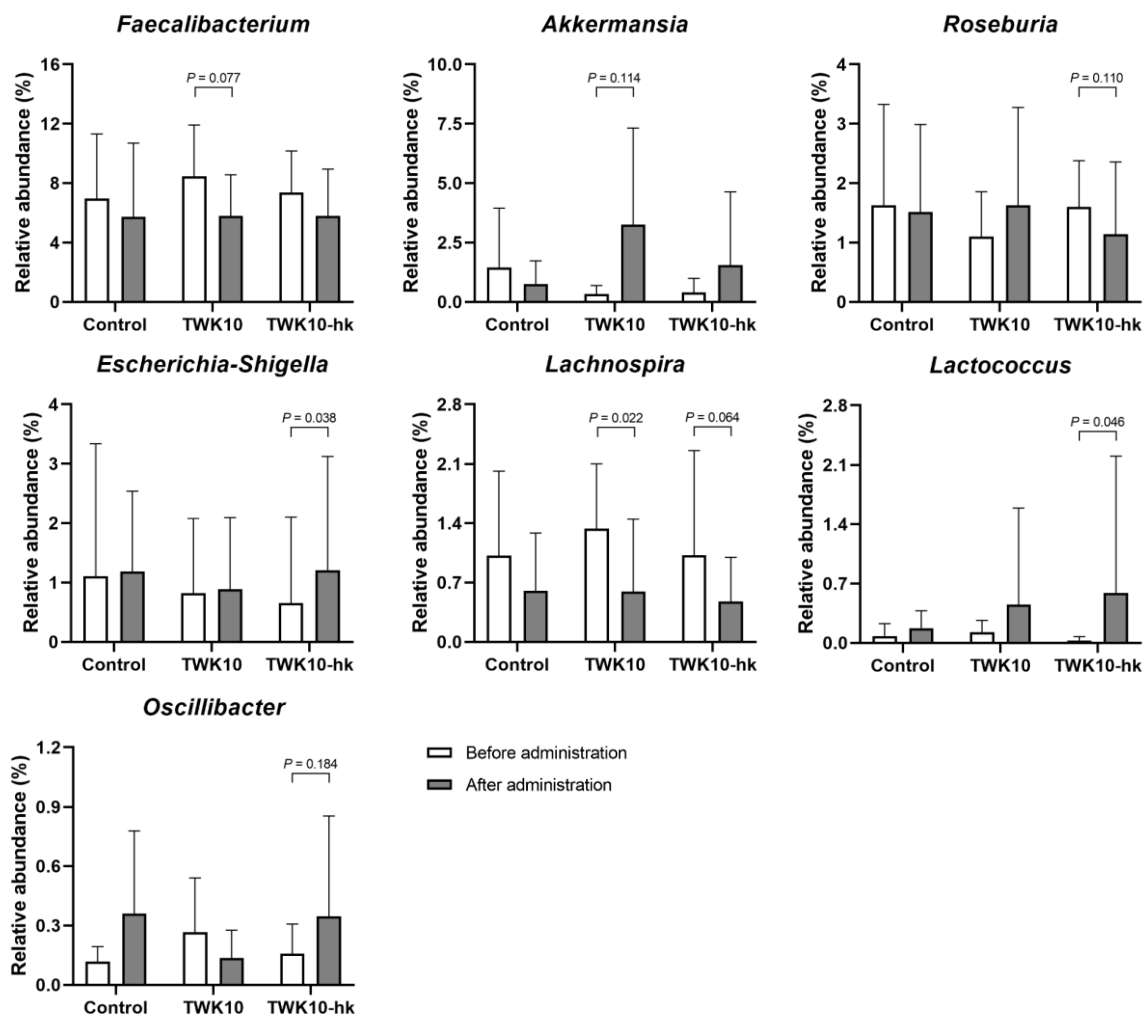

**Figure S2. Relative abundances of the major gut microbiota among groups.** Columns show the relative abundances of bacterial taxa at the genus level in the Control, TWK10, and TWK10-hk groups compared with their baselines. Data shown as mean  $\pm$  SD. Statistical differences between before and after administration were analyzed by Mann-Whitney *U* test.
